# Supplementary material for: River-discharge effects on United States Atlantic and Gulf coast sea-level changes
Source: PubMed Central journal article supplement — Proc Natl Acad Sci U S A. 2018 Jul 9;115(30):7729–34. doi: 10.1073/pnas.1805428115 (PMC6065007; doi:10.1073/pnas.1805428115), 2018-07-09
Supplement: pnas.1805428115.sapp.pdf [file pnas.1805428115.sapp.pdf]

# SI Appendix for “River-discharge effects on United States Atlantic and Gulf coast sea-level changes”

Christopher G. Piecuch<sup>a,1</sup>, Klaus Bittermann<sup>b</sup>, Andrew C. Kemp<sup>b</sup>, Rui M. Ponte<sup>c</sup>, Christopher M. Little<sup>c</sup>, Simon E. Engelhart<sup>d</sup>, and Steven J. Lentz<sup>a</sup>

<sup>a</sup>Physical Oceanography Department, Woods Hole Oceanographic Institution, 266 Woods Hole Rd., Woods Hole, Massachusetts, 02543, USA; <sup>b</sup>Department of Earth and Ocean Sciences, Tufts University, 2 North Hill Rd., Medford, Massachusetts, 02155, USA; <sup>c</sup>Oceanography Group, Atmospheric and Environmental Research, Inc., 131 Hartwell Ave., Lexington, Massachusetts, 02421, USA; <sup>d</sup>Department of Geosciences, University of Rhode Island, 9 East Alumni Ave., Kingston, Rhode Island, 02881, USA

**Additional details regarding data.** We consider 24 tide-gauge relative sea-level records along the United States Atlantic and Gulf coasts (Fig. 1a; Table S1). These monthly data were extracted from the website\* for the PSMSL RLR database (1) on 5 March 2018. Each time series has between 49–108 gauge-years of values. Annual water-year averages were computed from these monthly mean sea-level values.

We also use discharge data from 250 different stations along 26 rivers (Fig. 1a; Table S2). These annual water-year records were downloaded from the USGS Water Data for the Nation website† on 15 March 2018. The 250 stations constitute all the stations up and down these 26 rivers for which annual discharge data were available. The number of stations per river ranges from 2 (Edisto River) to 37 (Mississippi River). Descriptions of all river discharge stations used are included in Table S3.

**Production of discharge time series for individual rivers.** The USGS station records paint an incomplete picture of variable river discharge in space and time. For a given river, data from different stations can have different lengths, starting and stopping intermittently at different points, with many records featuring gaps (e.g., Fig. S5a). Moreover, time-mean discharge values and magnitudes of temporal variations can vary dramatically from one station to another along a given river (e.g., Fig. S5a). These realities make it challenging to derive a consistent, complete discharge record for a river over the 1910–2017 study period.

However, taking the logarithm of the discharge records along a river, we see that variations in

\* <http://www.psmsl.org/data/>

† <https://waterdata.usgs.gov/nwis>

26 log-transformed river discharge are strongly correlated and that magnitudes of log-transformed  
27 discharge fluctuations are comparable from one station to another (e.g., Fig. S5b). Such results are  
28 expected from simple physical considerations. Consider a rectangular river of width  $w$ , depth  $d$ , and  
29 length  $l$ . This river is situated within a rectangular watershed, which has the same length  $l$  but  
30 broader width  $W > w$ . Suppose also the river is “closed” at  $x = 0$  and “open” at  $x = l$ , emptying  
31 into a coastal ocean, where  $x$  is the coordinate along the river’s length, and that precipitation falls  
32 over the watershed at a spatially uniform but temporally variable volumetric rate per area  $q(t)$   
33 and that there is no evaporation. To conserve volume, the river velocity  $v(x, t)$  at  $x = \ell$  (where  
34  $\ell \in \{0, l\}$ ) must be  $v(\ell, t) = q(t)W\ell/wd$ . The logarithm of this expression can be written as a sum  
35 of two terms:  $\log[v(x, t)] = \log(W\ell/wd) + \log[q(t)]$ . Because  $W\ell/wd$  is a constant for a given river  
36 station, this implies that temporal variations in log-transformed river flow, while offset by constant  
37 values, will be identical from one river station to the next, independent of their respective locations  
38 along the river.

39 We use this line of reasoning to produce time series of river discharge as follows. First, for a given  
40 river, we compute the logarithm of all station discharge time series (e.g., Fig. S5b). Second, we  
41 remove the time-mean values from each of the log-transformed time series (Fig. S5c). Third, we  
42 compute the ensemble average (across stations) of these anomalous log-transformed time series,  
43 ignoring any gaps (Fig. S5c). Fourth, we add back the respective mean values to the individual  
44 log-transformed time series that were removed earlier (Fig. S5d), and then exponentiate the resulting  
45 time series (Fig. S5e). Fifth, in keeping with the simplifying assumption that discharge increases  
46 monotonically from the head to the mouth of the river, we choose the resulting time series with the  
47 largest time-mean value to be the river’s discharge time series to be compared with sea-level records.

48 We find that, for most rivers, this algorithm is capable of filling most data gaps and returning nearly  
49 complete river-discharge time series that are extremely correlated (typical correlation coefficients  
50  $\sim 0.99$ ; Fig. S5f) with the original but gappy and incomplete data. However, there are some generally  
51 smaller rivers (e.g., Cape Fear River, Neuse River) for which data are too sparse, and this algorithm

<sup>1</sup>To whom correspondence should be addressed. E-mail: [cpiecuch@whoi.edu](mailto:cpiecuch@whoi.edu)

52 could not address all gaps for the lack of data. We believe this simple algorithm is appropriate and  
53 sufficient in the present study focusing on establishing basic relationships between river discharge  
54 and sea level. However, future studies should consider using more sophisticated techniques for jointly  
55 filling gaps in the river-discharge and sea-level data (2).

56 **Construction of regional time series.** Following previous studies (3–5), to form regional sea-level time  
57 series, we removed the linear trend given the available data from each tide-gauge record. Then, for  
58 each of the four study regions, we averaged together the residual sea-level time series within any  
59 given region, ignoring any data gaps. The resulting regional time series are highly correlated with  
60 each of the original data records (Fig. S6).

61 Similarly, to compute regional river-discharge time series, we first removed linear trends (including  
62 time-mean values) from the data records. Then, for each region, we summed up the individual  
63 compiled river-discharge records (generated as described in the previous section) over that record,  
64 again ignoring missing values. Finally, we added back the sum of time-mean river-discharge values  
65 for that region (Fig. S7).

66 **Adjustment for climate.** A principal task of sea-level science is to causally attribute historical obser-  
67 vations of past sea-level changes. As explained in the introduction, changes in sea level can arise  
68 from myriad climate-system processes (3, 4, 6–18). Given the coupled nature of the climate system,  
69 causal attribution of sea level can be challenging, partly because there can be covariation between  
70 underlying processes driving changes in sea level, for example, winds and pressure (19). Partly  
71 for this reason, studies of dynamic sea-level changes (i.e., sea-level changes coupled to changes in  
72 ocean circulation) often adjust tide-gauge records prior to analysis. One such common correction is  
73 the so-called “inverted barometer” correction, whereby the influence of barometric pressure (which  
74 effects no changes in ocean circulation on time scales longer than a few days) is removed from  
75 sea-level records (14).

76 We attempt to identify the causal influence of river discharge on sea level. Since variable river  
77 discharge can be correlated with other climate processes (20), we desire to remove (as much as  
78 possible) the confounding effects of other processes from consideration. A challenge here relates to

79 our study period, which goes back to 1910: relevant local observations (e.g., of longshore winds or  
80 air pressure) needed for adjusting tide gauges and river records become sparser (or do not exist)  
81 earlier in time. Rather than attempt to adjust the data using incomplete local records, our approach  
82 is to remove from the tide-gauge and river-discharge time series any signals related to major modes  
83 of climate variation, which we believe are better constrained and capture some of the relevant  
84 large-scale behavior (in wind, pressure, etc.). Indeed, past studies find that adjusting tide-gauge  
85 records for large-scale modes of climate variability using linear regression can reduce the variance in  
86 the sea-level data (10, 11, 21, 22). Here we consider four large-scale modes of climate variability  
87 that have previously been shown to be significantly correlated with annual sea-level records at  
88 various locations along the United States Atlantic and Gulf coasts: North Atlantic Oscillation  
89 (NAO), Atlantic Multidecadal Oscillation (AMO), Pacific Decadal Oscillation (PDO), and the El  
90 Niño-Southern Oscillation (ENSO), in the form of the Niño 3.4 index. For all climate modes, we  
91 downloaded monthly time series from the website<sup>‡</sup> for the Working Group on Surface Pressure  
92 (WGSP) hosted by the National Oceanic and Atmospheric Administration (NOAA) Earth System  
93 Research Laboratory (ESRL) Physical Sciences Division (PSD) on 17 March 2018 and computed  
94 annual water-year averages over the 1910–2017 period.

95 Thus, we do not perform the traditional inverted-barometer correction. Rather, to adjust the data,  
96 for each local and regional river-discharge and sea-level time series, we computed the correlation  
97 coefficient between the river-discharge or sea-level record and the given climate mode and the climate  
98 mode’s Hilbert transform (to consider out-of-phase relationships). For each data time series, we  
99 used ordinary or multiple linear regression to remove estimated contributions due to all climate  
100 modes (and/or their Hilbert transforms) for which the correlation coefficient between the data and  
101 climate mode was statistically significant at the  $p < 0.05$  level (one-sided test). Table S4 details  
102 which climate modes and their Hilbert transforms are significantly correlated (or not) with each  
103 regional river-discharge and sea-level time series.

104 For context, we find that, for regional river discharge, adjusting for climate modes reduces the  
105 variance in the Gulf of Maine regional record by 0% (no significantly correlated climate modes),

<sup>‡</sup>[https://www.esrl.noaa.gov/psd/gcos\\_wgsp/Timeseries/](https://www.esrl.noaa.gov/psd/gcos_wgsp/Timeseries/)

106 Mid-Atlantic Bight by 0% (no significantly correlated climate modes), South Atlantic Bight by 10%,  
107 and Gulf of Mexico by 3%. Significant correlation found here between the AMO and river discharge  
108 over the Gulf of Mexico agrees with ref. (20), who determine that Mississippi River outflows can  
109 vary by  $\sim \pm 10\%$  and that flows into Lake Okeechobee (Florida) can vary by  $\sim \pm 40\%$  between warm  
110 and cool phases of the AMO. For regional sea level, removing climate-mode contributions reduces  
111 the variance in the Gulf of Maine record by 34%, Mid-Atlantic Bight by 13%, South Atlantic Bight  
112 by 12%, and Gulf of Mexico by 15%. The comparatively larger variance reduction in the Gulf of  
113 Maine sea-level time series is mainly due to the influence of the NAO. This finding is consistent with  
114 studies that show an important role for local wind and pressure effects (which are partly tied to  
115 the NAO) on interannual coastal sea-level changes in this region (10, 14, 15), supporting the basic  
116 validity of our approach.

117 The adjustment for climate modes does not radically alter the time series under consideration.  
118 Removal of climate modes does not influence the statistical significance of the relationship between  
119 river runoff and sea level in any region. However, this adjustment reduces the best estimate of the  
120 regression coefficient between river runoff and sea level by 8–43% depending on region. In any case,  
121 we grant that, while designed to reduce the risk of conflating the influence of river discharge on sea  
122 level with that of other drivers (e.g., wind, pressure, etc.), subtracting signals due to climate modes  
123 also risks removing some of the physics of interest to this study. Targeted future modeling studies  
124 could be more helpful and informative in this regard.

125 **Estimation of uncertainties on regression coefficients and  $p$ -values on correlation coefficients.** To esti-  
126 mate uncertainties on regression coefficients and significances ( $p$ -values) on correlation coefficients,  
127 we use Monte Carlo simulation and phase scrambling (or randomization) as described in refs. (23)  
128 and (24). Specifically, given a pair of time series  $x(t)$  and  $y(t)$ , we generate 1,000 pairs of random  
129 synthetic time series  $\hat{x}(t)$  and  $\hat{y}(t)$ , such that the Fourier amplitudes of  $\hat{x}(t)$  and  $\hat{y}(t)$  are identical to  
130 those of  $x(t)$  and  $y(t)$ ; however, the phases have been “scrambled.” The  $p$ -value on the correlation  
131 coefficient between  $x(t)$  and  $y(t)$  is computed as the fraction of  $[\hat{x}(t), \hat{y}(t)]$  pairs that have a larger  
132 correlation coefficient than between  $x(t)$  and  $y(t)$ . Similarly, the uncertainty on the regression coeffi-  
133 cient between  $x(t)$  and  $y(t)$  is the standard deviation of the 1,000 regression coefficients determined

134 from comparing all random  $[\hat{x}(t), \hat{y}(t)]$  pairs.

135 **Model assumptions.** In the main text, we list key assumptions underlying the theory for sea level  
136 driven by river discharge. Here we give additional details, justifying some of these assumptions.

137 We assume that motions are in steady state. Let us reconsider the far-field offshore momentum  
138 equation, now modified to incorporate the time tendency of offshore velocity  $u$ ,

$$\frac{\partial u}{\partial t} - fv = -g' \frac{\partial h}{\partial x}. \quad [S1]$$

139 We perform a scaling analysis, inserting reasonable values for velocities, offshore distance, layer  
140 thickness, and reduced gravity from Table 2 in ref. (25). For low-frequency motions, with periods  
141 longer than one year, the time tendency is several orders of magnitude smaller than the Coriolis  
142 acceleration and pressure gradient. Thus, our assumption of steady state is reasonable given the  
143 long time scales of interest. However, while unimportant in the present context, deviations from  
144 steady state would be important for higher-frequency motions (e.g., time scales of days).

145 We also assume that ocean-mass changes due to river discharge contribute negligibly to coastal  
146 sea-level changes. In principle, changes in sea level represent changes in water volume, which can  
147 arise from changes in ocean mass (bottom pressure) or density (steric height). Here we represent  
148 coastal sea-level changes driven by river discharge wholly in terms of density changes, ignoring  
149 the effects of mass. However, since, the river discharge itself constitutes a mass source, it is not  
150 immediately obvious that mass contributions to sea-level changes at the coast can be ignored, and  
151 this point warrants further discussion.

152 As freshwater from rivers debouches into the coastal ocean, mass is displaced and redistributed.  
153 Generally speaking, mass redistribution in the ocean is strongly related to the ocean's barotropic  
154 (depth-independent) adjustment to surface forcing (26). Basic linear theory anticipates that a  
155 barotropic ocean equilibrates quasi-instantaneously to surface freshwater forcing (27), such that  
156 the ocean-mass field responds isostatically (i.e., supporting minimal horizontal pressure gradients),  
157 resulting in horizontally uniform redistribution of water mass over the global ocean surface. In such  
158 a case, local sea-level changes related to ocean-mass redistribution and forced by river discharge are

159 expected to be negligible on the time scales of interest. Global barotropic ocean model simulations  
 160 largely corroborate this theoretical notion for open coastlines, showing that the local ocean-mass  
 161 response to variable surface freshwater forcing is relatively small ( $\sim 1$  mm root mean square  
 162 variability on seasonal to daily time scales; see Fig. 5 in ref. (27)). For these reasons, we believe it is  
 163 reasonable to assume that the influence of mass redistribution on coastal sea level is unimportant  
 164 here.

165 **Additional details regarding derivation.** Here we detail the mathematical steps relating Equations [1–3]  
 166 to Equation [4]. First, we divide Equation [2] by  $S_0$  to solve for  $Q_E$ . We substitute this expression  
 167 for  $Q_E$  on the right hand side of Equation [1]. After collecting terms and canceling common factors,  
 168 one derives an expression relating  $Q_T$  and  $Q_F$ ,

$$Q_T = \frac{S_0}{\delta S} Q_F. \quad [S2]$$

169 This is a form of Knudsen’s Hydrographical theorem (28). Now, by definition we have that,

$$Q_T = - \int_{x=0}^{x=\mathcal{W}} (vh) dx, \quad [S3]$$

170 where  $\mathcal{W}$  is the (unknown) width of the far-field alongshore flow at which point the buoyant layer  
 171 thickness goes to zero. Combining Equations [S3] and [S2] gives,

$$\frac{S_0}{\delta S} Q_F = - \int_{x=0}^{x=\mathcal{W}} (vh) dx. \quad [S4]$$

172 Multiplying Equation [3] by  $h$ , dividing by  $-f$ , and using the product rule gives,

$$vh = \frac{g'}{2f} \frac{\partial}{\partial x} h^2. \quad [S5]$$

173 Substituting the right hand side of Equation [S4] for  $vh$  within the integral on the left hand side of  
174 Equation [S3] and evaluating the integral (recalling that  $h$  goes to zero at  $x = \mathcal{W}$ ) gives,

$$\frac{g'}{2f}h_0^2 = \frac{S_0}{\delta S}Q_F. \quad [S6]$$

175 Solving for  $h_0$  in Equation [S5] thus leads to the desired result.

## 176 References

- 177 1. Holgate S J, Coauthors (2013) New Data Systems and Products at the Permanent Service for Mean Sea Level. *J. Coastal Res.* 29(3): 493–504.
- 178 2. Piecuch C G, Huybers P, Tingley M P (2017) Comparison of full and empirical Bayes approaches for inferring sea-level changes from tide-gauge data. *J. Geophys. Res.* 122: 2243–2258.
- 179 3. Thompson P R, Mitchum G T (2014) Coherent sea level variability on the North Atlantic western boundary. *J. Geophys. Res. Oceans* 119: 5676–5689.
- 180 4. Woodworth P L, Morales Maqueda M A, Roussenov V M, Williams R G, Hughes C W (2014) Mean sea-level variability along the northeast American Atlantic coast and the roles of the wind and the  
181 overturning circulation. *J. Geophys. Res. Oceans* 119: 8916–8935.
- 182 5. Meade R H, Emery K O (1971) Sea Level as Affected by River Runoff, Eastern United States. *Science* 173(3995): 425–428.
- 183 6. Bingham R J, Hughes C W (2009) Signature of the Atlantic meridional overturning circulation in sea level along the east coast of North America. *Geophys. Res. Lett.* 36: L02603.
- 184 7. Boon J D (2012), Evidence of Sea Level Acceleration at U.S. and Canadian Tide Stations, Atlantic Coast, North America. *J. Coastal Res.* 28(6): 1437–1445.
- 185 8. Ezer T, Corlett W B (2012) Is sea level rise accelerating in the Chesapeake Bay? A demonstration of a novel new approach for analyzing sea level data. *Geophys. Res. Lett.* 39: L19605.
- 186 9. Kopp R E (2013) Does the mid-Atlantic United States sea level acceleration hot spot reflect ocean dynamic variability? *Geophys. Res. Lett.* 40: 3981–3985.
- 187 10. Andres M, Gawarkiewicz G G, Toole J M (2013) Interannual sea level variability in the western North Atlantic: Regional forcing and remote response. *Geophys. Res. Lett.* 40: 5915–5919.
- 188 11. Calafat F M, Chambers D P (2013) Quantifying recent acceleration in sea level unrelated to internal climate variability. *Geophys. Res. Lett.* 40: 3661–3666.
- 189 12. Yin J, Goddard P B (2013) Oceanic control of sea level rise patterns along the Atlantic and Gulf coasts of the United States. *Geophys. Res. Lett.* 40: 5514–5520.
- 190 13. Goddard P B, Yin J, Griffies S M, Zhang S (2015) An extreme event of sea-level rise along the Northeast coast of North America in 2009–2010. *Nat. Commun.* 6: 6346.
- 191 14. Piecuch C G, Ponte R M (2015) Inverted barometer contributions to recent sea level changes along the northeast coast of North America. *Geophys. Res. Lett.* 42: 5918–5925.
- 192 15. Piecuch C G, Dangendorf S, Ponte R M, Marcos M (2016) Annual Sea Level Changes on the North American Northeast Coast: Influence of Local Winds and Barotropic Motions. *J. Climate*, 29:  
193 4801–4816.
- 194 16. Davis J L, Vinogradova N T (2017) Causes of accelerating sea level on the Atlantic and Gulf coasts of North America. *Geophys. Res. Lett.* 44: 5133–5141.
- 195 17. Frederikse T, Simon K, Katsman C A, Riva R (2017) The sea-level budget along the Northwest Atlantic coast: GIA, mass changes, and large-scale ocean dynamics. *J. Geophys. Res. Oceans* 122:  
196 5486–5501.
- 197 18. Little C M, Piecuch C G, Ponte R M (2017) On the relationship between the meridional overturning circulation, alongshore wind stress, and United States Atlantic and Gulf coasts sea level in the  
198 Community Earth System Model Large Ensemble. *J. Geophys. Res. Oceans* 122(6): 4554–4568:
- 199 19. Ponte R M (1994) Understanding the relation between wind- and pressure-driven sea level variability. *J. Geophys. Res.* 99(C4): 8033–8039.
- 200 20. Enfield D B, Mestas-Nuñez A M, Trimble P J (2001) The Atlantic multidecadal oscillation and its relation to rainfall and river flows in the continental U.S. *Geophys. Res. Lett.* 28(10): 2077–2080.
- 201 21. Hamlington B D, Leben R R, Kim K-Y, Nerem R S, Atkinson L P, Thompson P R (2015) The effect of the El Niño-Southern Oscillation on U.S. regional and coastal sea level. *J. Geophys. Res.* 120:  
202 3970–3986.
- 203 22. McCarthy G D, Haigh I D, Hirschi J J-M, Grist, J P, Smeed D A (2015) Ocean impact on decadal Atlantic climate variability revealed by sea-level observations. *Nature* 521: 508–510.
- 204 23. Theiler J, Eubank S, Longtin A, Galdrikian B, Doynne Farmer J (1992) Testing for nonlinearity in time series: the method of surrogate data. *Physica D* 58: 77–94.
- 205 24. Piecuch C G, Ponte R M, Little C M, Buckley M W, Fukumori I (2017) Mechanisms underlying recent decadal changes in subpolar North Atlantic Ocean heat content. *J. Geophys. Res.* 122:  
206 7181–7197.
- 207 25. Yankovsky A E, Chapman D C (1997) A Simple Theory for the Fate of Buoyant Coastal Discharges. *J. Phys. Oceanogr.*, 27, 1386–1401.
- 208 26. Piecuch C G, Fukumori I, Ponte R M, Wang O (2015) Vertical Structure of Ocean Pressure Variations with Application to Satellite-Gravimetric Observations. *J. Atmos. Ocean. Tech.* 32: 603–613.
- 209 27. Ponte R M (2006) Oceanic Response to Surface Loading Effects Neglected in Volume-Conserving Models. *J. Phys. Oceanogr.* 36: 426–434.
- 210 28. Dyer K R (1997) *Estuaries: A Physical Introduction*. Wiley, 195 pp.
- 211 29. Horner-Devine A R, Hetland R D, MacDonald D G (2015) Mixing and Transport in Coastal River Plumes. *Annu. Rev. Fluid Mech.* 47: 569–594.
- 212 30. Dai A (2016) Historical and Future Changes in Streamflow and Continental Runoff. In *Terrestrial Water Cycle and Climate Change: Natural and Human-Induced Impacts*, Geophysical Monograph  
213 221, First Edition, American Geophysical Union, pp. 17–38.



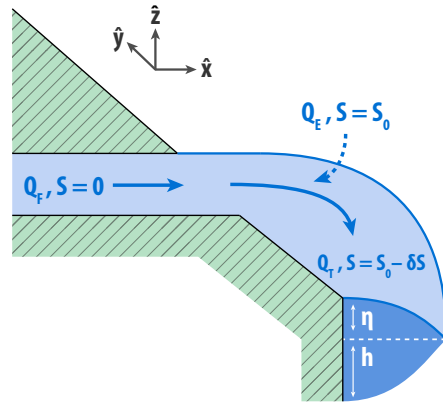

**Fig. S1.** Illustration of the key quantities used to construct the theoretical relationship between river discharge and sea level, showing river flow entering into the coastal ocean and flowing into an alongshore current in the Northern Hemisphere. Different volumetric flows ( $Q_F$ ,  $Q_E$ , and  $Q_T$ ) and salinities ( $S_0$ ,  $\delta S$ ) are shown, along with the layer-thickness ( $h$ ) and sea-level ( $\eta$ ) anomalies of interest. Arrows indicate the sense of the flow. For more detailed schematics, see Figs. 1, 2, and 4 in ref. (29).

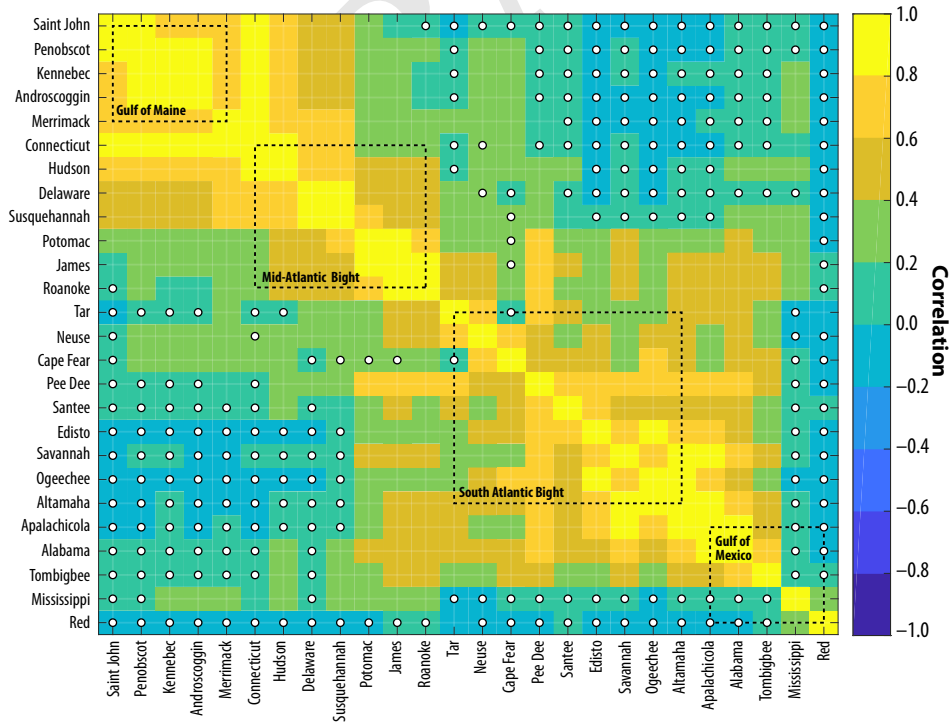

**Fig. S2.** Shading shows correlation coefficient between all possible pairs of river-discharge time series. All time series have been adjusted for large-scale climate modes as with the regional time series. White dots indicate values not statistically significant at the  $p < 0.05$  level.

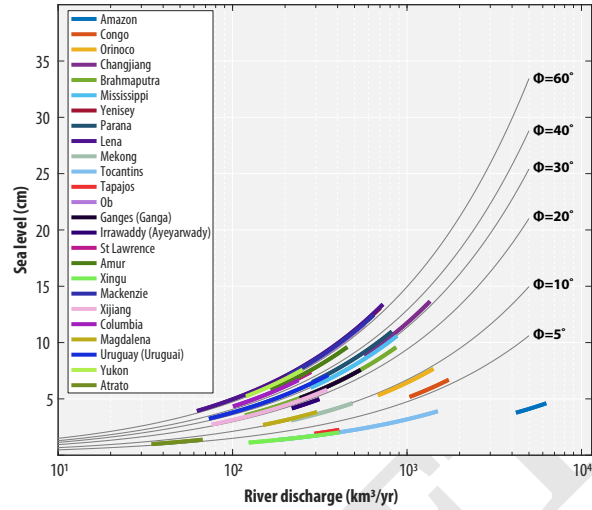

**Fig. S3.** Sea level driven by river discharge based on the theory developed here. Note the semilogarithmic horizontal axis. Black curves show sea level predicted by Equation [5] as a function of river discharge for a variety of latitude ( $\Phi$ ) values. Various colored sections indicate predicted range of sea-level for the 25 largest rivers in the world (by annual discharge), given the latitudes of and observations of annual discharge from those rivers (from the database of ref. (30)). For example, the Mackenzie River (dark blue curve; latitude  $68.75^\circ\text{N}$ ) has a mean discharge observed over 1943–2010 of  $287\text{ km}^3\text{ yr}^{-1}$  with a minimum annual-mean value of  $206\text{ km}^3\text{ yr}^{-1}$  observed in 1995 and a maximum annual mean of  $645\text{ km}^3\text{ yr}^{-1}$  observed in 1949 (30). Based on Equation [5], these discharge values translate to a mean downstream sea-increase of  $\sim 10\text{ cm}$ , with sea-level values ranging from a minimum of  $\sim 7\text{ cm}$  for lowest river discharge to a maximum of  $\sim 12\text{ cm}$  for highest river discharge.

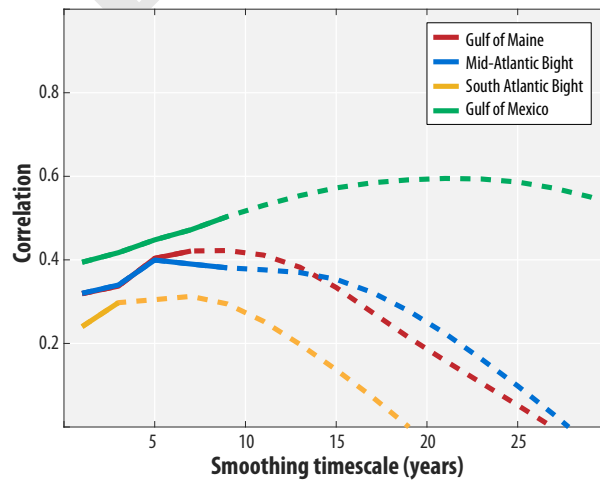

**Fig. S4.** Colored curves indicate the correlation coefficient between regional river-discharge and sea-level time series for the four different study regions as a function of the window size (“smoothing timescale”) of a Hann filter applied to the data. Thick solid curves indicate correlation coefficients significant at the  $p < 0.05$  level whereas thin dashed curves indicate values that are statistically insignificant.

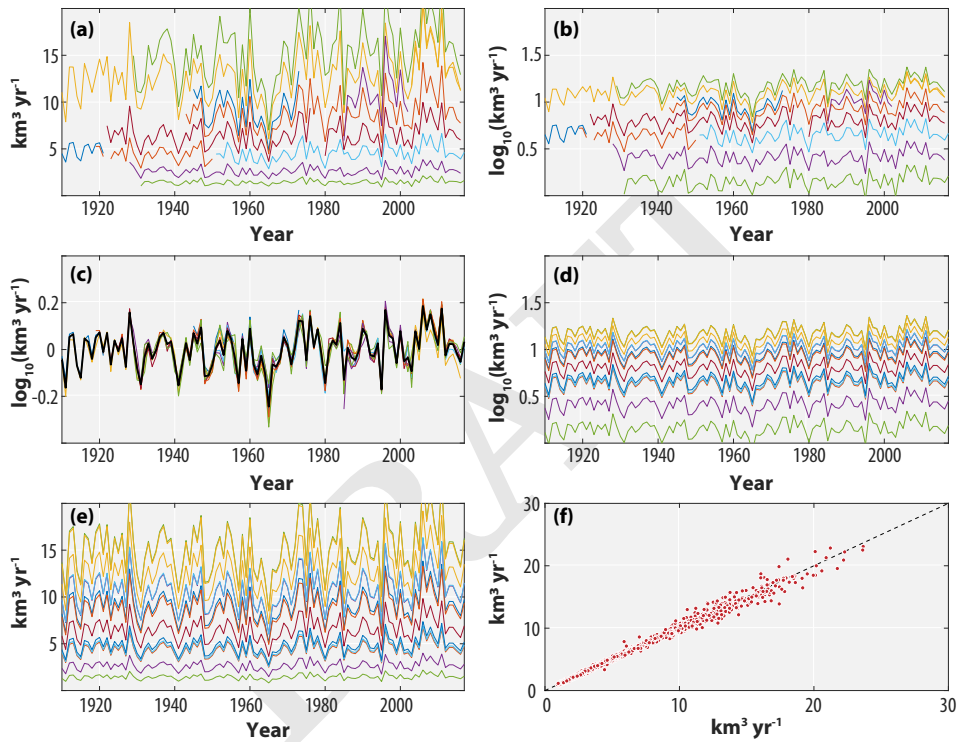

**Fig. S5.** Demonstration of the compilation of river-discharge time series for the example case of the Connecticut River. **a.** Different colors show raw discharge data series from 15 different stations along the river. **b.** Colored curves represent the logarithm (base 10) of the time series in **a.** **c.** Colored curves are identical to those in **b** but with the time-mean values removed. The black curve is the average across all colored curves (ignoring missing data). **d.** Colored curves represent respectively the black ensemble-averaged time series from **c** with the various individual time-mean values from the different river stations (formerly removed going from **b** to **c**) added back. **e.** Exponentiation of the time series in **d.** The time series with the largest mean value is taken as the time series to be used in comparison to sea-level data (stations indicated in Table S2). **f.** Orange dots are a scatter plot comparing the raw observed discharge data values (horizontal axis) plotted against the processed and recompiled discharge values (vertical axis) for all stations and time points with data. Blue dotted line is the 1:1 curve.

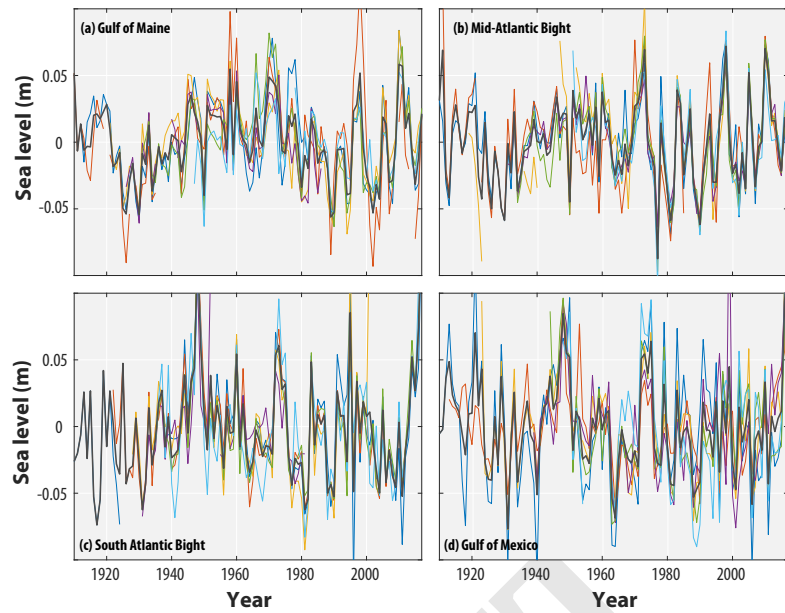

**Fig. S6.** Detrended annual water-mean average sea-level time series from individual tide-gauge stations (colors) and averaged over all tide gauges within a given region (black) for a. Gulf of Maine, b. Mid-Atlantic Bight, c. South Atlantic Bight, and d. Gulf of Mexico. See Fig. 1 for station locations. Note that these time series have not yet been adjusted for large-scale climate modes.

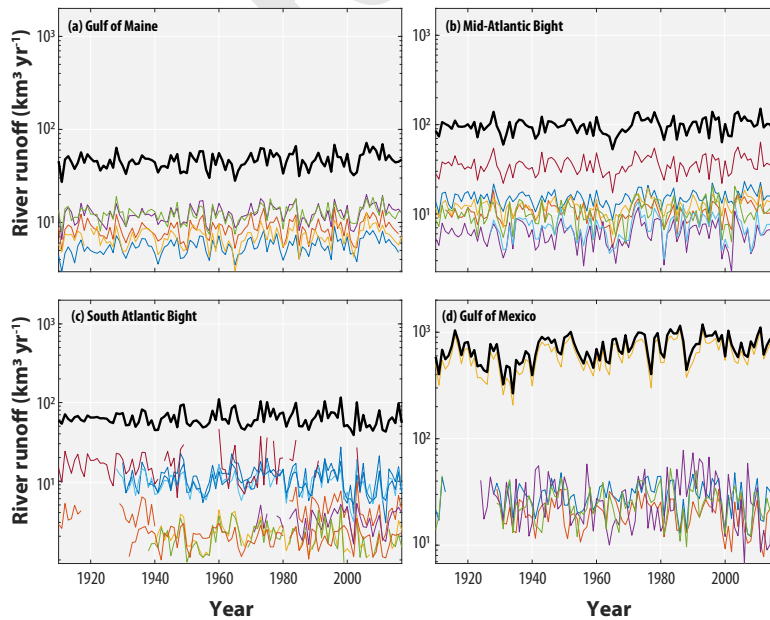

**Fig. S7.** Logarithm of detrended annual water-mean average river-discharge time series (but with time-mean values retained) from individual rivers (colors) and summed over all rivers within a given region (black) for a. Gulf of Maine, b. Mid-Atlantic Bight, c. South Atlantic Bight, and d. Gulf of Mexico. See Fig. 1 for station locations. Note that these time series have not yet been adjusted for large-scale climate modes.

| No. | Region | Location, State      | PSMSL ID | Longitude | Latitude | Duration (Completeness) |
|-----|--------|----------------------|----------|-----------|----------|-------------------------|
| 1   | GME    | Saint John, NB       | 195      | 66.1°W    | 45.3°N   | 1910–2017 (93%)         |
| 2   | GME    | Eastport, ME         | 332      | 67°W      | 44.9°N   | 1930–2017 (99%)         |
| 3   | GME    | Bar Harbor, ME       | 525      | 68.2°W    | 44.4°N   | 1947–2017 (99%)         |
| 4   | GME    | Portland, ME         | 183      | 70.2°W    | 43.7°N   | 1912–2017 (100%)        |
| 5   | GME    | Seavey Island, ME    | 288      | 70.7°W    | 43.1°N   | 1926–1986 (93%)         |
| 6   | GME    | Boston, MA           | 235      | 71.1°W    | 42.4°N   | 1921–2017 (100%)        |
| 7   | MAB    | Newport, RI          | 351      | 71.3°W    | 41.5°N   | 1931–2017 (100%)        |
| 8   | MAB    | New York, NY         | 12       | 74°W      | 40.7°N   | 1910–2017 (100%)        |
| 9   | MAB    | Atlantic City, NJ    | 180      | 74.4°W    | 39.4°N   | 1911–2017 (98%)         |
| 10  | MAB    | Sandy Hook, NJ       | 366      | 74°W      | 40.5°N   | 1933–2017 (100%)        |
| 11  | MAB    | Lewes, DE            | 224      | 75.1°W    | 38.8°N   | 1919–2017 (81%)         |
| 12  | MAB    | Kiptopeke Beach, VA  | 636      | 76°W      | 37.2°N   | 1951–2017 (100%)        |
| 13  | SAB    | Wilmington, NC       | 396      | 78°W      | 34.2°N   | 1935–2017 (100%)        |
| 14  | SAB    | Charleston, SC       | 234      | 79.9°W    | 32.8°N   | 1922–2017 (100%)        |
| 15  | SAB    | Fort Pulaski, GA     | 395      | 80.9°W    | 32°N     | 1935–2017 (100%)        |
| 16  | SAB    | Fernandina Beach, FL | 112      | 81.5°W    | 30.7°N   | 1910–2017 (87%)         |
| 17  | SAB    | Mayport, FL          | 316      | 81.4°W    | 30.4°N   | 1928–2001 (100%)        |
| 18  | SAB    | Miami Beach, FL      | 363      | 80.1°W    | 25.8°N   | 1931–1981 (96%)         |
| 19  | GMX    | Key West, FL         | 188      | 81.8°W    | 24.6°N   | 1913–2017 (100%)        |
| 20  | GMX    | Cedar Key, FL        | 428      | 83°W      | 29.1°N   | 1939–2017 (100%)        |
| 21  | GMX    | Pensacola, FL        | 246      | 87.2°W    | 30.4°N   | 1923–2017 (100%)        |
| 22  | GMX    | Galveston, TX        | 161      | 94.8°W    | 29.3°N   | 1910–2017 (100%)        |
| 23  | GMX    | Rockport, TX         | 538      | 97°W      | 28°N     | 1948–2017 (89%)         |
| 24  | GMX    | Port Isabel, TX      | 497      | 97.2°W    | 26.1°N   | 1944–2017 (99%)         |

**Table S1. Listing of all tide-gauge relative sea-level records used here, given with their respective region, PSMSL ID, longitude and latitude, as well as the duration over 1910–2017 covered by the data and the record completeness (i.e., percent of years during the duration for which data are available). The regional acronyms are: GME (Gulf of Maine), MAB (Mid-Atlantic Bight), SAB (South Atlantic Bight), and GMX (Gulf of Mexico).**

| No. | Region | River Name   | Location, State   | USGS ID  | Longitude | Latitude |
|-----|--------|--------------|-------------------|----------|-----------|----------|
| 1   | GME    | Saint John   | Van Buren, ME     | 01015000 | 67.9°W    | 47.2°N   |
| 2   | GME    | Penobscot    | Eddington, ME     | 01036390 | 68.7°W    | 44.8°N   |
| 3   | GME    | Kennebec     | Waterville, ME    | 01049205 | 69.6°W    | 44.5°N   |
| 4   | GME    | Androscoggin | Auburn, ME        | 01059000 | 70.2°W    | 44.1°N   |
| 5   | GME    | Merrimack    | Lowell, MA        | 01100000 | 71.3°W    | 42.6°N   |
| 6   | MAB    | Connecticut  | Thompsonville, CT | 01184000 | 72.6°W    | 42°N     |
| 7   | MAB    | Hudson       | Green Island, NY  | 01358000 | 73.7°W    | 42.8°N   |
| 8   | MAB    | Delaware     | Trenton, NJ       | 01463500 | 74.8°W    | 40.2°N   |
| 9   | MAB    | Susquehanna  | Conowingo, MD     | 01578310 | 76.2°W    | 39.7°N   |
| 10  | MAB    | Potomac      | Washington, DC    | 01646502 | 77.1°W    | 38.9°N   |
| 11  | MAB    | James        | Cartersville, VA  | 02035000 | 78.1°W    | 37.7°N   |
| 12  | MAB    | Roanoke      | Clarksville, VA   | 02079000 | 78.6°W    | 36.6°N   |
| 13  | SAB    | Tar          | Greenville, NC    | 02084000 | 77.4°W    | 35.6°N   |
| 14  | SAB    | Neuse        | Fort Barnwell, NC | 02091814 | 77.3°W    | 35.3°N   |
| 15  | SAB    | Cape Fear    | Kelly, NC         | 02105769 | 78.3°W    | 34.4°N   |
| 16  | SAB    | Pee Dee      | Bucksport, SC     | 02135200 | 79.2°W    | 33.7°N   |
| 17  | SAB    | Santee       | Ferguson, SC      | 02170000 | 80.3°W    | 33.4°N   |
| 18  | SAB    | Edisto       | Givhans, SC       | 02175000 | 80.4°W    | 33°N     |
| 19  | SAB    | Savannah     | Cylo, GA          | 02198500 | 81.3°W    | 32.5°N   |
| 20  | SAB    | Ogeechee     | Eden, GA          | 02202500 | 81.4°W    | 32.2°N   |
| 21  | SAB    | Altamaha     | Doctortown, GA    | 02226000 | 81.8°W    | 31.7°N   |
| 22  | GMX    | Apalachicola | Sumatra, FL       | 02359170 | 85°W      | 29.9°N   |
| 23  | GMX    | Alabama      | Claiborne, AL     | 02429500 | 87.5°W    | 31.5°N   |
| 24  | GMX    | Tombigbee    | Coffeetown, AL    | 02469761 | 88.1°W    | 31.8°N   |
| 25  | GMX    | Mississippi  | Vicksburg, MS     | 07289000 | 90.9°W    | 32.3°N   |
| 26  | GMX    | Red          | Alexandria, LA    | 07355500 | 92.4°W    | 31.3°N   |

**Table S2. Listing of all main river-discharge records used here, given along with their respective region, USGS ID, the location of the river gauge, as well as the location's longitude and latitude. Note that gaps in the discharge records have been filled where possible using methods described in the SI Appendix. The regional acronyms are: GME (Gulf of Maine), MAB (Mid-Atlantic Bight), SAB (South Atlantic Bight), and GMX (Gulf of Mexico).**

| River              | USGS ID  | USGS Site Name                                     |
|--------------------|----------|----------------------------------------------------|
| Alabama River      | 02423000 | ALABAMA RIVER AT SELMA AL                          |
| Alabama River      | 02427500 | ALABAMA RIVER NEAR MILLERS FERRY AL                |
| Alabama River      | 02420000 | ALABAMA RIVER NEAR MONTGOMERY, AL.                 |
| Alabama River      | 02429500 | ALABAMA RIVER AT CLAIBORNE AL                      |
| Alabama River      | 02428400 | ALABAMA RIVER AT CLAIBORNE L&D NEAR MONROEVILLE    |
| Altamaha River     | 02226000 | ALTAMAHA RIVER AT DOCTORTOWN, GA                   |
| Altamaha River     | 02225000 | ALTAMAHA RIVER NEAR BAXLEY, GA                     |
| Altamaha River     | 02224940 | ALTAMAHA RIVER AT US 221, NR CHARLOTTEVILLE, GA    |
| Androscoggin River | 01053600 | Androscoggin River below Bog Brook at Cambridge NH |
| Androscoggin River | 01053500 | Androscoggin River at Errol, NH                    |
| Androscoggin River | 01059000 | Androscoggin River near Auburn, Maine              |
| Androscoggin River | 01054000 | Androscoggin River near Gorham, NH                 |
| Androscoggin River | 01054500 | Androscoggin River at Rumford, Maine               |
| Apalachicola River | 02358700 | APALACHICOLA RIVER NR BLOUNTSTOWN,FLORIDA          |
| Apalachicola River | 02359170 | APALACHICOLA RIVER NR SUMATRA,FLA.                 |
| Apalachicola River | 02358754 | APALACHICOLA R.AB CHIPOLA CONR WEWAHITCHKA,FLA     |
| Apalachicola River | 02358000 | APALACHICOLA RIVER AT CHATTAHOOCHEE FLA            |
| Apalachicola River | 02358754 | APALACHICOLA RIVER AT MILE 36.0                    |
| Cape Fear River    | 02105769 | CAPE FEAR R AT LOCK #1 NR KELLY, NC                |
| Cape Fear River    | 02105500 | CAPE FEAR R AT WILM O HUSKE LOCK NR TARHEEL, NC    |
| Cape Fear River    | 02104000 | CAPE FEAR RIVER AT FAYETTEVILLE, NC                |
| Cape Fear River    | 02102500 | CAPE FEAR RIVER AT LILLINGTON, NC                  |
| Connecticut River  | 01156500 | CONNECTICUT RIVER AT VERNON, VT                    |
| Connecticut River  | 01139500 | CONNECTICUT RIVER AT SOUTH NEWBURY, VT             |
| Connecticut River  | 01170500 | CONNECTICUT RIVER AT MONTAGUE CITY, MA             |
| Connecticut River  | 01131500 | CONNECTICUT RIVER NEAR DALTON, NH                  |
| Connecticut River  | 01184000 | CONNECTICUT RIVER AT THOMPSONVILLE, CT             |
| Connecticut River  | 01138500 | CONNECTICUT RIVER AT WELLS RIVER, VT               |
| Connecticut River  | 01144500 | CONNECTICUT RIVER AT WEST LEBANON, NH              |
| Connecticut River  | 01140500 | CONNECTICUT RIVER AT ORFORD, NH                    |
| Connecticut River  | 01154500 | CONNECTICUT RIVER AT NORTH WALPOLE, NH             |
| Connecticut River  | 01129200 | CONNECTICUT R BELOW INDIAN STREAM NR PITTSBURG, NH |
| Connecticut River  | 01172010 | CONNECTICUT R AT I-391 BRIDGE AT HOLYOKE, MA       |
| Connecticut River  | 01172003 | CONNECTICUT RIVER BELOW POWER DAM AT HOLYOKE,MA    |
| Connecticut River  | 01129500 | CONNECTICUT RIVER AT NORTH STRATFORD, NH           |
| Connecticut River  | 01172000 | CONNECTICUT RIVER AT HOLYOKE, MA                   |
| Connecticut River  | 01128500 | CONNECTICUT R AT FIRST CONN LK NR PITTSBURG, NH    |
| Delaware River     | 01427207 | DELAWARE RIVER AT LORDVILLE NY                     |
| Delaware River     | 01427405 | DELAWARE R NR CALLICOON NY                         |
| Delaware River     | 01434000 | DELAWARE RIVER AT PORT JERVIS NY                   |
| Delaware River     | 01460440 | Delaware and Raritan Canal at Port Mercer NJ       |
| Delaware River     | 01446700 | Delaware River at Easton, PA                       |
| Delaware River     | 01428500 | DELAWARE R ABOVE LACKAWAXEN R NEAR BARRYVILLE NY   |
| Delaware River     | 01446500 | Delaware River at Belvidere NJ                     |
| Delaware River     | 01463500 | Delaware River at Trenton NJ                       |
| Delaware River     | 01438500 | Delaware River at Montague NJ                      |
| Delaware River     | 01427510 | DELAWARE RIVER AT CALLICOON NY                     |
| Edisto River       | 02174000 | EDISTO RIVER NEAR BRANCHVILLE, SC                  |
| Edisto River       | 02175000 | EDISTO RIVER NR GIVHANS, SC                        |
| Hudson River       | 01314000 | HUDSON R AT GOOLEY, NEAR INDIAN LAKE NY            |
| Hudson River       | 01331095 | HUDSON RIVER AT STILLWATER NY                      |
| Hudson River       | 01312000 | HUDSON RIVER NEAR NEWCOMB NY                       |
| Hudson River       | 01335754 | HUDSON RIVER ABOVE LOCK 1 NEAR WATERFORD NY        |
| Hudson River       | 01327750 | HUDSON RIVER AT FORT EDWARD NY                     |
| Hudson River       | 01326500 | HUDSON RIVER AT SPIER FALLS NY                     |
| Hudson River       | 01315500 | HUDSON RIVER AT NORTH CREEK NY                     |
| Hudson River       | 01318500 | HUDSON RIVER AT HADLEY NY                          |
| Hudson River       | 01358000 | HUDSON RIVER AT GREEN ISLAND NY                    |
| Hudson River       | 01335500 | HUDSON RIVER AT MECHANICVILLE NY                   |
| Hudson River       | 01329650 | HUDSON RIVER AT SCHUYLerville NY                   |
| Hudson River       | 01318000 | HUDSON RIVER AT THURMAN NY                         |
| Hudson River       | 01328770 | HUDSON RIVER AT THOMSON NY                         |

|                   |          |                                                    |
|-------------------|----------|----------------------------------------------------|
| James River       | 02026000 | JAMES RIVER AT BENT CREEK, VA                      |
| James River       | 02019500 | JAMES RIVER AT BUCHANAN, VA                        |
| James River       | 02035000 | JAMES RIVER AT CARTERSVILLE, VA                    |
| James River       | 02037500 | JAMES RIVER NEAR RICHMOND, VA                      |
| James River       | 02024752 | JAMES RIVER AT BLUE RIDGE PKWY NR BIG ISLAND, VA   |
| James River       | 02025500 | JAMES RIVER AT HOLCOMB ROCK, VA                    |
| James River       | 02029000 | JAMES RIVER AT SCOTTSVILLE, VA                     |
| James River       | 02016500 | JAMES RIVER AT LICK RUN, VA                        |
| James River       | 02037000 | JAMES RIVER AND KANAWHA CANAL NEAR RICHMOND, VA    |
| James River       | 02025510 | JAMES RIVER AT SALT CREEK, VA                      |
| Kennebec River    | 01046500 | Kennebec River at Bingham, Maine                   |
| Kennebec River    | 01047150 | Kennebec River near Madison, Maine                 |
| Kennebec River    | 01049265 | Kennebec River at North Sidney, Maine              |
| Kennebec River    | 01041000 | KENNEBEC RIVER AT MOOSEHEAD, ME                    |
| Kennebec River    | 01042500 | Kennebec River at The Forks, Maine                 |
| Kennebec River    | 01048500 | KENNEBEC RIVER AT WATERVILLE, ME                   |
| Kennebec River    | 01049205 | Kennebec River near Waterville, ME                 |
| Merrimack River   | 01081500 | MERRIMACK RIVER AT FRANKLIN JUNCTION, NH           |
| Merrimack River   | 01088500 | MERRIMACK RIVER AT GARVINS FALLS, NH               |
| Merrimack River   | 01092000 | MERRIMACK R NR GOFFS FALLS, BELOW MANCHESTER, NH   |
| Merrimack River   | 01100000 | MERRIMACK RIVER BL CONCORD RIVER AT LOWELL, MA     |
| Merrimack River   | 01090500 | MERRIMACK RIVER AT MANCHESTER, NH                  |
| Mississippi River | 05200445 | MISSISSIPPI RIVER AT BEMIDJI, MN                   |
| Mississippi River | 05242300 | MISSISSIPPI RIVER AT BRAINERD, MN                  |
| Mississippi River | 05207600 | MISSISSIPPI RIVER AT WILLOW BEACH AT BALL CLUB, MN |
| Mississippi River | 05587450 | Mississippi River at Grafton, IL                   |
| Mississippi River | 05283500 | MISSISSIPPI RIVER AT US HWY 169 AT CHAMPLIN, MN    |
| Mississippi River | 05587455 | MISSISSIPPI RIVER BELOW GRAFTON, IL                |
| Mississippi River | 05227530 | MISSISSIPPI RIVER DIVERSION NEAR AITKIN, MN        |
| Mississippi River | 05288500 | MISSISSIPPI RIVER AT HWY 610 IN BROOKLYN PARK, MN  |
| Mississippi River | 05331000 | MISSISSIPPI RIVER AT ST. PAUL, MN                  |
| Mississippi River | 05227500 | MISSISSIPPI RIVER AT AITKIN, MN                    |
| Mississippi River | 05200510 | MISSISSIPPI RIVER NEAR BEMIDJI, MN                 |
| Mississippi River | 07022000 | Mississippi River at Thebes, IL                    |
| Mississippi River | 05416100 | MISSISSIPPI R AT LOCK & DAM 12 AT BELLEVUE, IA     |
| Mississippi River | 05344500 | MISSISSIPPI RIVER AT PRESCOTT, WI                  |
| Mississippi River | 05378500 | MISSISSIPPI RIVER AT WINONA, MN                    |
| Mississippi River | 05270700 | MISSISSIPPI RIVER AT ST. CLOUD, MN                 |
| Mississippi River | 05355250 | MISSISSIPPI RIVER AT RED WING, MN                  |
| Mississippi River | 07265450 | MISSISSIPPI RIV NR ARKANSAS CITY, ARK.             |
| Mississippi River | 05261000 | MISSISSIPPI RIVER NEAR FORT RIPLEY, MN             |
| Mississippi River | 07374525 | Mississippi River at Belle Chasse, LA              |
| Mississippi River | 05383500 | MISSISSIPPI RIVER AT LA CROSSE, WI                 |
| Mississippi River | 05220500 | MISSISSIPPI RIVER BELOW SANDY RIVER NR LIBBY, MN   |
| Mississippi River | 07289000 | MISSISSIPPI RIVER AT VICKSBURG, MS                 |
| Mississippi River | 05355250 | MISSISSIPPI RIVER AT RED WING, MN                  |
| Mississippi River | 05220600 | MISSISSIPPI RIVER AT PALISADE, MN                  |
| Mississippi River | 07020500 | Mississippi River at Chester, IL                   |
| Mississippi River | 05267000 | MISSISSIPPI RIVER NEAR ROYALTON, MN                |
| Mississippi River | 05420500 | Mississippi River at Clinton, IA                   |
| Mississippi River | 05587500 | Mississippi River at Alton, IL                     |
| Mississippi River | 07010000 | Mississippi River at St. Louis, MO                 |
| Mississippi River | 05474500 | Mississippi River at Keokuk, IA                    |
| Mississippi River | 05211000 | MISSISSIPPI RIVER AT GRAND RAPIDS, MN              |
| Mississippi River | 07047970 | MISSISSIPPI RIVER AT HELENA, ARK.                  |
| Mississippi River | 05275500 | MISSISSIPPI RIVER AT ELK RIVER, MN                 |
| Mississippi River | 05389500 | Mississippi River at McGregor, IA                  |
| Mississippi River | 07374000 | Mississippi River at Baton Rouge, LA               |
| Mississippi River | 05331580 | MISSISSIPPI RIVER BELOW L&D #2 AT HASTINGS, MN     |



|                 |          |                                                      |
|-----------------|----------|------------------------------------------------------|
| Neuse River     | 02087414 | 0 NEUSE R TRIB AT NRWWTP (EASTERN STE) NR AUBURN, NC |
| Neuse River     | 02087500 | NEUSE RIVER NEAR CLAYTON, NC                         |
| Neuse River     | 02087000 | NEUSE RIVER NEAR NORTHSIDE, NC                       |
| Neuse River     | 02087570 | NEUSE RIVER AT SMITHFIELD, NC                        |
| Neuse River     | 02087190 | NEUSE RIVER NEAR NEUSE, NC                           |
| Neuse River     | 02087183 | NEUSE RIVER NEAR FALLS, NC                           |
| Neuse River     | 02089500 | NEUSE RIVER AT KINSTON, NC                           |
| Neuse River     | 02091814 | NEUSE RIVER NEAR FORT BARNWELL, NC                   |
| Neuse River     | 02087182 | 0 NEUSE RIVER AT FALLS, NC                           |
| Neuse River     | 02087396 | 8 NEUSE R TRIB AT NRWWTP (CENTRAL STE) NR AUBURN, NC |
| Neuse River     | 02089000 | NEUSE RIVER NEAR GOLDSBORO, NC                       |
| Neuse River     | 02087396 | 4 NEUSE R TRIB AT NRWWTP (CMP SITE) NR AUBURN, NC    |
| Ogeechee River  | 02202040 | OGEECHEE RIVER AT ROCKY FORD RD, NR ROCKY FORD, GA   |
| Ogeechee River  | 02202680 | OGEECHEE RIVER AT GA 204, NEAR ELLABELL, GA          |
| Ogeechee River  | 02200120 | OGEECHEE RIVER AT GA 88, NEAR GRANGE, GA             |
| Ogeechee River  | 02202190 | OGEECHEE RIVER AT GA 24, NEAR OLIVER, GA             |
| Ogeechee River  | 02200500 | OGEECHEE RIVER AT US 1, NEAR LOUISVILLE, GA          |
| Ogeechee River  | 02202000 | OGEECHEE RIVER AT SCARBORO, GA                       |
| Ogeechee River  | 02201230 | OGEECHEE RIVER AT MIDVILLE, GA                       |
| Ogeechee River  | 02202500 | OGEECHEE RIVER NEAR EDEN, GA                         |
| Pee Dee River   | 02135200 | PEE DEE RIVER AT HWY 701 NR BUCKSPORT, SC            |
| Pee Dee River   | 02131000 | PEE DEE RIVER AT PEEDEE, SC                          |
| Pee Dee River   | 02130561 | PEE DEE RIVER NR BENNETTSTVILLE, SC                  |
| Pee Dee River   | 02131010 | PEE DEE RIVER BELOW PEE DEE, SC                      |
| Pee Dee River   | 02129000 | PEE DEE R NR ROCKINGHAM, NC                          |
| Pee Dee River   | 02123784 | 5 PEE DEE R AT HWY731 BL LK TILLERY NR NORWOOD, NC   |
| Pee Dee River   | 02135210 | PEE DEE R LOWER TOPSAW LANDING NR PLANTERSVILLE      |
| Pee Dee River   | 02127500 | PEE DEE R NR ANSONVILLE, NC                          |
| Penobscot River | 01034500 | Penobscot River at West Enfield, Maine               |
| Penobscot River | 01036000 | PENOBSCOT RIVER AT PASSADUMKEAG, ME                  |
| Penobscot River | 01036390 | Penobscot River at Eddington, Maine                  |
| Penobscot River | 01030000 | PENOBSCOT RIVER NEAR MATTAWAMKEAG, ME                |
| Potomac River   | 01613000 | POTOMAC RIVER AT HANCOCK, MD                         |
| Potomac River   | 01646502 | POTOMAC RIVER (ADJUSTED) NEAR WASH, DC               |
| Potomac River   | 01618000 | POTOMAC RIVER AT SHEPHERDSTOWN, WV                   |
| Potomac River   | 01646500 | POTOMAC RIVER NEAR WASH, DC LITTLE FALLS PUMP STA    |
| Potomac River   | 01610000 | POTOMAC RIVER AT PAW PAW, WV                         |
| Potomac River   | 01638500 | POTOMAC RIVER AT POINT OF ROCKS, MD                  |
| Red River       | 07332000 | Red River near Colbert, OK                           |
| Red River       | 07344370 | Red River at Spring Bank, AR                         |
| Red River       | 07316000 | Red River near Gainesville, TX                       |
| Red River       | 07355500 | RED R @ ALEXANDRIA, LA                               |
| Red River       | 07335500 | Red River at Arthur City, TX                         |
| Red River       | 07337000 | Red River at Index, AR                               |
| Red River       | 07331600 | Red River at Denison Dam nr Denison, TX              |
| Red River       | 07344400 | Red River near Hosston, LA.                          |
| Red River       | 07336820 | Red River near De Kalb, TX                           |
| Red River       | 07341500 | RED RIVER AT FULTON, ARK.                            |
| Roanoke River   | 02054530 | ROANOKE RIVER AT GLENVAR, VA                         |
| Roanoke River   | 02079000 | ROANOKE (STAUNTON) RIVER AT CLARKSVILLE, VA          |
| Roanoke River   | 02067000 | ROANOKE (STAUNTON) RIVER NEAR CLOVER, VA             |
| Roanoke River   | 02066000 | ROANOKE (STAUNTON) RIVER AT RANDOLPH, VA             |
| Roanoke River   | 02054500 | ROANOKE RIVER AT LAFAYETTE, VA                       |
| Roanoke River   | 02062500 | ROANOKE (STAUNTON) RIVER AT BROOKNEAL, VA            |
| Roanoke River   | 02066500 | ROANOKE CREEK AT SAXE, VA                            |
| Roanoke River   | 02060500 | ROANOKE RIVER AT ALTAVISTA, VA                       |
| Roanoke River   | 02054510 | ROANOKE RIVER NEAR WABUN, VA                         |
| Roanoke River   | 02055000 | ROANOKE RIVER AT ROANOKE, VA                         |
| Roanoke River   | 02059000 | ROANOKE RIVER NEAR GRETN, VA                         |
| Roanoke River   | 02065200 | ROANOKE (STAUNTON) RIVER AT CLARKTON, VA             |
| Roanoke River   | 02057500 | ROANOKE (STAUNTON) RIVER NEAR TOSHES, VA             |
| Roanoke River   | 02056000 | ROANOKE RIVER AT NIAGARA, VA                         |
| Roanoke River   | 02079500 | ROANOKE RIVER AT BUGGS ISLAND, VA                    |
| Santee River    | 02171650 | SANTEE RIVER BELOW ST STEPHENS, SC                   |
| Santee River    | 02170000 | SANTEE RIVER AT FERGUSON, S. C.                      |
| Santee River    | 02171500 | SANTEE RIVER NEAR PINEVILLE, SC                      |

|                   |          |                                                    |
|-------------------|----------|----------------------------------------------------|
| Savannah River    | 02198375 | SAVANNAH RIVER NEAR ESTILL, SC                     |
| Savannah River    | 02276568 | SAVANNAHS DRAINAGE CANAL AT PORT ST LUCIE FL       |
| Savannah River    | 02197320 | SAVANNAH R. NR JACKSON, SC                         |
| Savannah River    | 02187252 | SAVANNAH RIVER BELOW HARTWELL LK NR HARTWELL, GA   |
| Savannah River    | 02197500 | SAVANNAH R AT BURTONS FERRY BR NR MILLHAVEN, GA    |
| Savannah River    | 02187500 | SAVANNAH RIVER NEAR IVA,S.C.                       |
| Savannah River    | 02197326 | SAVANNAH RIVER NEAR WAYNESBORO, GA                 |
| Savannah River    | 02198500 | SAVANNAH RIVER NEAR CLYO, GA                       |
| Savannah River    | 02196484 | SAVANNAH RIVER NEAR NORTH AUGUSTA, SC              |
| Savannah River    | 02195000 | SAVANNAH RIVER NEAR CLARKS HILL, S.C.              |
| Savannah River    | 02197000 | SAVANNAH RIVER AT AUGUSTA, GA                      |
| Savannah River    | 02189000 | SAVANNAH RIVER NEAR CALHOUN FALLS, S. C.           |
| St John River     | 01014000 | St. John River below Fish R, nr Fort Kent, Maine   |
| St John River     | 01015000 | ST. JOHN RIVER AT VAN BUREN, ME                    |
| St John River     | 01010000 | St. John River at Ninemile Bridge, Maine           |
| St John River     | 01012500 | ST. JOHN RIVER ABOVE FISH R, AT FORT KENT, ME      |
| St John River     | 01010500 | St. John River at Dickey, Maine                    |
| Susquehanna River | 01538700 | Susquehanna River at Bloomsburg, PA                |
| Susquehanna River | 01502632 | SUSQUEHANNA RIVER AT BAINBRIDGE NY                 |
| Susquehanna River | 01503000 | SUSQUEHANNA RIVER AT CONKLIN NY                    |
| Susquehanna River | 01554000 | Susquehanna River at Sunbury, PA                   |
| Susquehanna River | 01513831 | SUSQUEHANNA RIVER AT OWEGO NY                      |
| Susquehanna River | 01515050 | Susquehanna River at Sayre, PA                     |
| Susquehanna River | 01536500 | Susquehanna River at Wilkes-Barre, PA              |
| Susquehanna River | 01577000 | Susquehanna River near McCalls Ferry, PA           |
| Susquehanna River | 01515000 | SUSQUEHANNA RIVER NEAR WAVERLY NY                  |
| Susquehanna River | 01576000 | Susquehanna River at Marietta, PA                  |
| Susquehanna River | 01497500 | SUSQUEHANNA R AT COLLIERSVILLE NY                  |
| Susquehanna River | 01500500 | SUSQUEHANNA RIVER AT UNADILLA NY                   |
| Susquehanna River | 01498620 | SUSQUEHANNA RIVER SOUTHWEST OF ONEONTA NY          |
| Susquehanna River | 01513500 | SUSQUEHANNA RIVER AT VESTAL NY                     |
| Susquehanna River | 01531500 | Susquehanna River at Towanda, PA                   |
| Susquehanna River | 01578310 | SUSQUEHANNA RIVER AT CONOWINGO, MD                 |
| Susquehanna River | 01533400 | Susquehanna River at Meshoppen, PA                 |
| Susquehanna River | 01570500 | Susquehanna River at Harrisburg, PA                |
| Susquehanna River | 01540500 | Susquehanna River at Danville, PA                  |
| Susquehanna River | 01502731 | SUSQUEHANNA RIVER AT WINDSOR NY                    |
| Tar River         | 02081747 | TAR R AT US 401 AT LOUISBURG, NC                   |
| Tar River         | 02084000 | TAR RIVER AT GREENVILLE, NC                        |
| Tar River         | 02082000 | TAR RIVER NEAR NASHVILLE, NC                       |
| Tar River         | 02083976 | 5 TAR RIVER TRIB BL SCHOOLHOUSE BR AT GREENVILLE   |
| Tar River         | 02081500 | TAR RIVER NEAR TAR RIVER, NC                       |
| Tar River         | 02083500 | TAR RIVER AT TARBORO, NC                           |
| Tar River         | 02081942 | TAR RIVER AT NC-581 NEAR SPRING HOPE, NC           |
| Tar River         | 02081740 | TAR RIVER AT LOUISBURG, NC                         |
| Tar River         | 02082504 | 0 TAR RIVER BELOW DAM NEAR LANGLEY CROSSROADS, NC  |
| Tar River         | 02082506 | TAR R BL TAR R RESERVOIR NR ROCKY MOUNT, NC        |
| Tar River         | 02082585 | TAR RIVER AT NC 97 AT ROCKY MOUNT, NC              |
| Tar River         | 02083976 | 6 TAR RIVER TRIBUTARY AT GREENVILLE, NC            |
| Tar River         | 02082610 | TAR RIVER NEAR ROCKY MOUNT, NC                     |
| Tombigbee River   | 02449000 | TOMBIGBEE RIVER AT GAINESVILLE, AL                 |
| Tombigbee River   | 02467000 | TOMBIGBEE R AT DEMOPOLIS L&D NEAR COATOPA, AL.     |
| Tombigbee River   | 02431500 | TOMBIGBEE R AT BEANS FERRY NR FULTON, MS           |
| Tombigbee River   | 02444500 | TOMBIGBEE RIVER NEAR COCHRANE, AL.                 |
| Tombigbee River   | 02433500 | TOMBIGBEE RIVER AT BIGBEE, MS                      |
| Tombigbee River   | 02441390 | TOMBIGBEE RIVER AT STENNIS LOCK AND DAM, MS        |
| Tombigbee River   | 02469761 | TOMBIGBEE R AT COFFEEVILLE L&D NR COFFEEVILLE, AL. |
| Tombigbee River   | 02444160 | TOMBIGBEE RIVER AT BEVILL L&D NR PICKENSVILLE, AL  |
| Tombigbee River   | 02449500 | TOMBIGBEE RIVER AT EPES, AL.                       |
| Tombigbee River   | 02437500 | TOMBIGBEE RIVER AT ABERDEEN, MS                    |
| Tombigbee River   | 02447025 | TOMBIGBEE R AT HEFLIN L&D NR GAINESVILLE ALA.      |
| Tombigbee River   | 02431000 | TOMBIGBEE RIVER NR FULTON, MS                      |
| Tombigbee River   | 02470000 | TOMBIGBEE RIVER NEAR LEROY, AL.                    |

**Table S3. List of all USGS sites whose river discharge data were used in this study.**

| Region | Variable        | NAO | HNAO | AMO | HAMO | ENSO | HENSO | PDO | HPDO |
|--------|-----------------|-----|------|-----|------|------|-------|-----|------|
| GME    | Sea level       | Yes | Yes  | No  | Yes  | No   | Yes   | No  | No   |
| GME    | River discharge | No  | No   | No  | No   | No   | No    | No  | No   |
| MAB    | Sea level       | No  | No   | No  | Yes  | No   | Yes   | No  | No   |
| MAB    | River discharge | No  | No   | No  | No   | No   | No    | No  | No   |
| SAB    | Sea level       | Yes | No   | No  | No   | No   | No    | No  | No   |
| SAB    | River discharge | No  | No   | No  | No   | Yes  | Yes   | Yes | No   |
| GMX    | Sea level       | Yes | No   | No  | No   | No   | Yes   | No  | No   |
| GMX    | River discharge | No  | No   | Yes | No   | No   | No    | No  | No   |

**Table S4.** Table showing which climate modes (NAO, AMO, ENSO, PDO) and their Hilbert transforms (HNAO, HAMO, HENSO, HPDO) are significantly correlated with each of the regional river-discharge or sea-level time series. The regional acronyms are: GME (Gulf of Maine), MAB (Mid-Atlantic Bight), SAB (South Atlantic Bight), and GMX (Gulf of Mexico).
